# Supplementary material for: Nutrient Flows and Biogeomorphic Feedbacks: Linking Seabird Guano to Plant traits and Morphological Change on Sandy Islands
Source: Copernicus journal article supplement (doi:10.5194/egusphere-2025-3265), 2025-08-11
Supplement: Supplementary file 1 [file egusphere-2025-3265-supplement.pdf]

# Nutrient Flows and Biogeomorphic Feedbacks: Linking Seabird Guano to Plant traits and Morphological Change on Sandy Islands

F.F. van Rees<sup>1,2,3\*</sup>, L.L. Govers<sup>1,4</sup>, P.Guseva<sup>2</sup>, M.P.A. Zwarts<sup>2</sup>, C. Tuijnman<sup>2</sup>, C.J. Camphuysen<sup>1</sup>, G.  
Ruessink<sup>2</sup>, V.C. Reijers<sup>2</sup>

<sup>1</sup> Department of Coastal Systems, Royal Netherlands Institute for Sea Research, Texel, the  
Netherlands; <sup>2</sup> Utrecht University; <sup>3</sup> Deltares; <sup>4</sup> Groningen Institute for Evolutionary Life Sciences  
(GELIFES) University of Groningen, Groningen, the Netherlands

\*corresponding author: [floris.van.rees@nioz.nl](mailto:floris.van.rees@nioz.nl)

# 1 Supplements

S1: Number of breeding pairs per species per islands.

|                                                 | Zuiderduin | Rottumerplaat | Rottumeroog | Richel | Griend |
|-------------------------------------------------|------------|---------------|-------------|--------|--------|
| <i>Larus argentatus</i> and <i>Larus fuscus</i> | 796        | 4519          | 794         | 687    | 1270   |
| <i>Chroicocephalus ridibundus</i>               | 13         |               |             |        | 5282   |
| <i>Phalacrocorax carbo</i>                      | 267        |               |             | 64     |        |
| <i>Larus canus</i>                              | 13         |               | 45          |        |        |
| <i>Thalasseus sandvicensis</i>                  |            |               |             |        | 2797   |
| <i>Platalea leucorodia</i>                      |            |               |             |        | 54     |
| <i>Sterna paradisaea</i>                        |            |               |             |        | 67     |
| <i>Sterna hirundo</i>                           |            |               |             |        | 312    |

S2: Contributions and loadings per environmental variable to the primary PC axes that explain at least 85% of total variance.

|                        | Contributions (%) |     | Loadings |       |
|------------------------|-------------------|-----|----------|-------|
|                        | PC1               | PC2 | PC1      | PC2   |
| Distance from coast    | 32                | 36  | 0.56     | -0.60 |
| Soil organic matter    | 52                | 0   | 0.72     | 0.03  |
| Mean Elevation in 2022 | 16                | 64  | -0.40    | -0.80 |

S3: Contributions and loadings per vegetation trait to the primary PC axes that explain at least 85% of total variance.

|                       | Contributions (%) |     |     | Loadings |       |       |
|-----------------------|-------------------|-----|-----|----------|-------|-------|
|                       | PC1               | PC2 | PC3 | PC1      | PC2   | PC3   |
| C:N ratio             | 3                 | 48  | 1   | -0.18    | -0.69 | -0.08 |
| C                     | 26                | 0   | 11  | -0.51    | -0.04 | -0.33 |
| N                     | 1                 | 49  | 2   | -0.10    | 0.70  | -0.12 |
| Vegetation height     | 33                | 0   | 10  | -0.58    | -0.05 | 0.31  |
| Vegetation root depth | 14                | 1   | 46  | -0.37    | 0.08  | -0.68 |
| Vegetation biomass    | 23                | 2   | 31  | -0.48    | 0.16  | 0.56  |

S4: Number of cells, Coordinates and descriptive statistics of the five islands analysed in this study. Descriptive statistics of NDVI, GI and Z are given for the years 2022 and 2021 and displayed as (Mean  $\pm$  SD).

| Variable        | Zuiderduin | Richel | Rottumeroog | Rottumerplaat | Griend |
|-----------------|------------|--------|-------------|---------------|--------|
| Number of cells | 68279      | 10979  | 128465      | 501266        | 79591  |
| Area (ha)       | 61         | 10     | 116         | 451           | 72     |

|                                       |               |               |               |               |               |
|---------------------------------------|---------------|---------------|---------------|---------------|---------------|
| Longitude                             | 53°31'0"N     | 53°17'50"N    | 53°32'25"N    | 53°32'30"N    | 53°15'55"N    |
| Latitude                              | 6°35'0"E      | 5°8'5"E       | 6°34'55"E     | 6°28'51"E     | 5°15'15"E     |
| NDVI <sub>2021</sub>                  | 0.311 ± 0.212 | 0.334 ± 0.153 | 0.332 ± 0.186 | 0.343 ± 0.199 | 0.461 ± 0.180 |
| NDVI <sub>2022</sub>                  | 0.312 ± 0.180 | 0.328 ± 0.156 | 0.327 ± 0.173 | 0.302 ± 0.189 | 0.442 ± 0.200 |
| GI <sub>2021</sub> (d <sup>-1</sup> ) | 0.001 ± 0.001 | 0.002 ± 0.002 | 0.002 ± 0.001 | 0.001 ± 0.001 | 0.003 ± 0.001 |
| GI <sub>2022</sub> (d <sup>-1</sup> ) | 0.001 ± 0.001 | 0.002 ± 0.001 | 0.001 ± 0.001 | 0.001 ± 0.001 | 0.002 ± 0.001 |
| Z <sub>2021</sub> (m)                 | 1.437 ± 0.425 | 1.517 ± 0.343 | 2.113 ± 1.042 | 1.858 ± 1.095 | 1.569 ± 0.990 |
| Z <sub>2022</sub> (m)                 | 1.426 ± 0.408 | 2.210 ± 0.734 | 2.210 ± 1.098 | 1.908 ± 1.126 | 1.866 ± 0.760 |

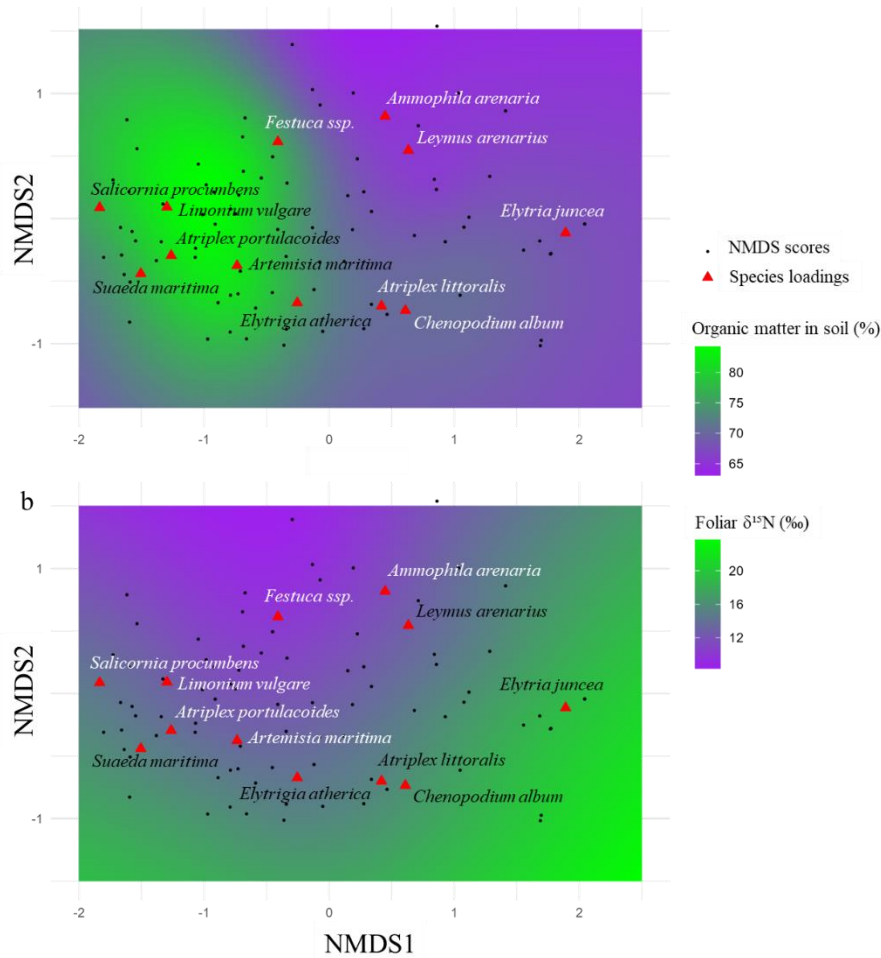

S5: Prediction of organic matter in the soil (a), and foliar  $\delta^{15}\text{N}$  (b) based on NMDS scores of plot locations. Here, organic matter and foliar  $\delta^{15}\text{N}$  values are explained by a smoothed interaction effect between NMDS1, and NMDS2 ( $s(\text{NMDS1}, \text{NMDS2})$ ),  $p < 0.05$ . We solved for larger scale spatial autocorrelation by a tensor smoother on coordinates ( $te(X, Y)$ ),  $p < 0.05$ . Smoothers were performed by GAMs from the mgcv package in R (Wood & Augustin, 2002), however this term was not used for prediction purposes, only for improving the accuracy of the  $s(\text{NMDS1}, \text{NMDS2})$  smoother.

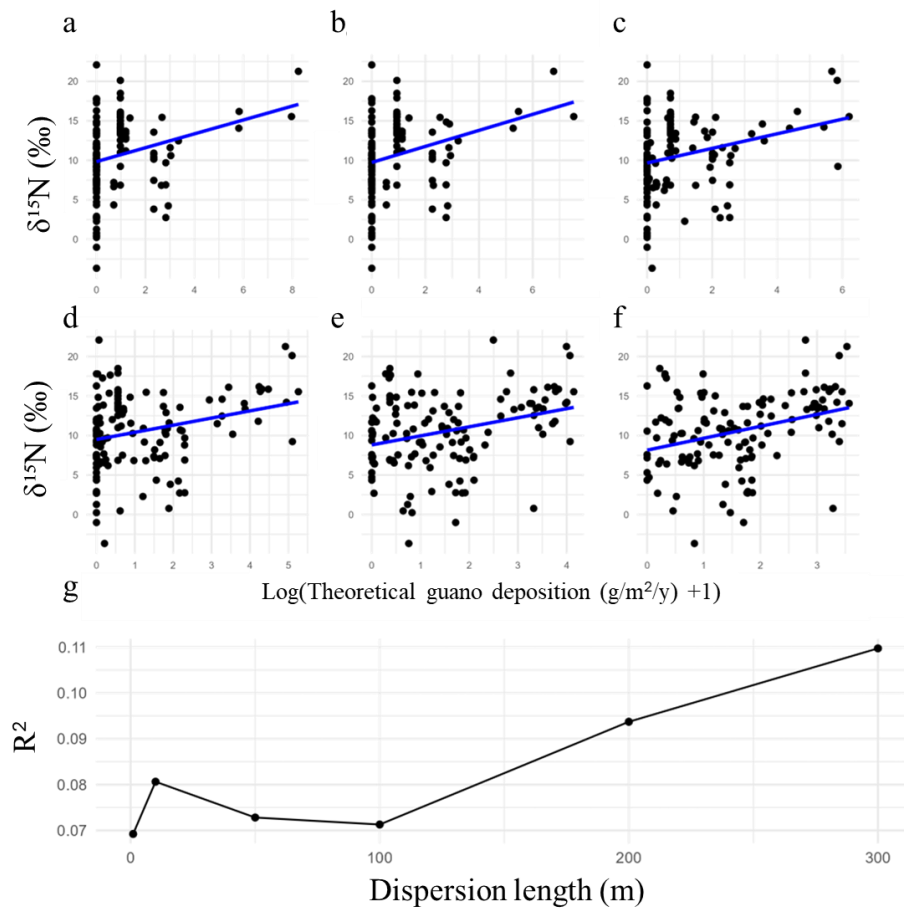

S6: Relationship between  $\delta^{15}\text{N}$  and theoretical guano deposition computed by the data-informed model for different dispersion lengths (1, 10, 50, 100, 200, 300 m) for panels A-F respectively. Panel G shows the change of the  $R^2$  as a function of the dispersion length.

S7: Summary of posterior distributions of coefficient values are expressed as (Mean  $\pm$  SD).

| Predictor                                         | GI-Based Model     | NDVI-Based Model   |
|---------------------------------------------------|--------------------|--------------------|
| (Intercept)                                       | 0.132 $\pm$ 0.035  | 0.134 $\pm$ 0.042  |
| Log(Guano+1)                                      | 0.050 $\pm$ 0.024  | 0.037 $\pm$ 0.028  |
| Vegetation Change ( $\Delta$ GI or $\Delta$ NDVI) | -0.038 $\pm$ 0.012 | 0.038 $\pm$ 0.026  |
| Vegetation State in 2021 (GI or NDVI)             | -0.014 $\pm$ 0.011 | 0.010 $\pm$ 0.014  |
| Elevation (2021)                                  | -0.080 $\pm$ 0.007 | -0.081 $\pm$ 0.007 |
| Island (Richel)                                   | 0.731 $\pm$ 0.144  | 0.802 $\pm$ 0.169  |
| Island (Rottumeroog)                              | 0.085 $\pm$ 0.095  | 0.071 $\pm$ 0.112  |
| Island (Rottumerplaat)                            | -0.182 $\pm$ 0.078 | -0.203 $\pm$ 0.093 |
| Island (Zuiderduin)                               | -0.259 $\pm$ 0.103 | -0.294 $\pm$ 0.123 |
| Log(Guano+1) $\times$ Vegetation Change           | 0.010 $\pm$ 0.005  | -0.033 $\pm$ 0.010 |
| Vegetation Change $\times$ Richel                 | -0.034 $\pm$ 0.015 | -0.187 $\pm$ 0.034 |
| Vegetation Change $\times$ Rottumeroog            | 0.111 $\pm$ 0.021  | -0.029 $\pm$ 0.036 |
| Vegetation Change $\times$ Rottumerplaat          | 0.033 $\pm$ 0.017  | -0.054 $\pm$ 0.032 |
| Vegetation Change $\times$ Zuiderduin             | 0.014 $\pm$ 0.017  | 0.001 $\pm$ 0.029  |

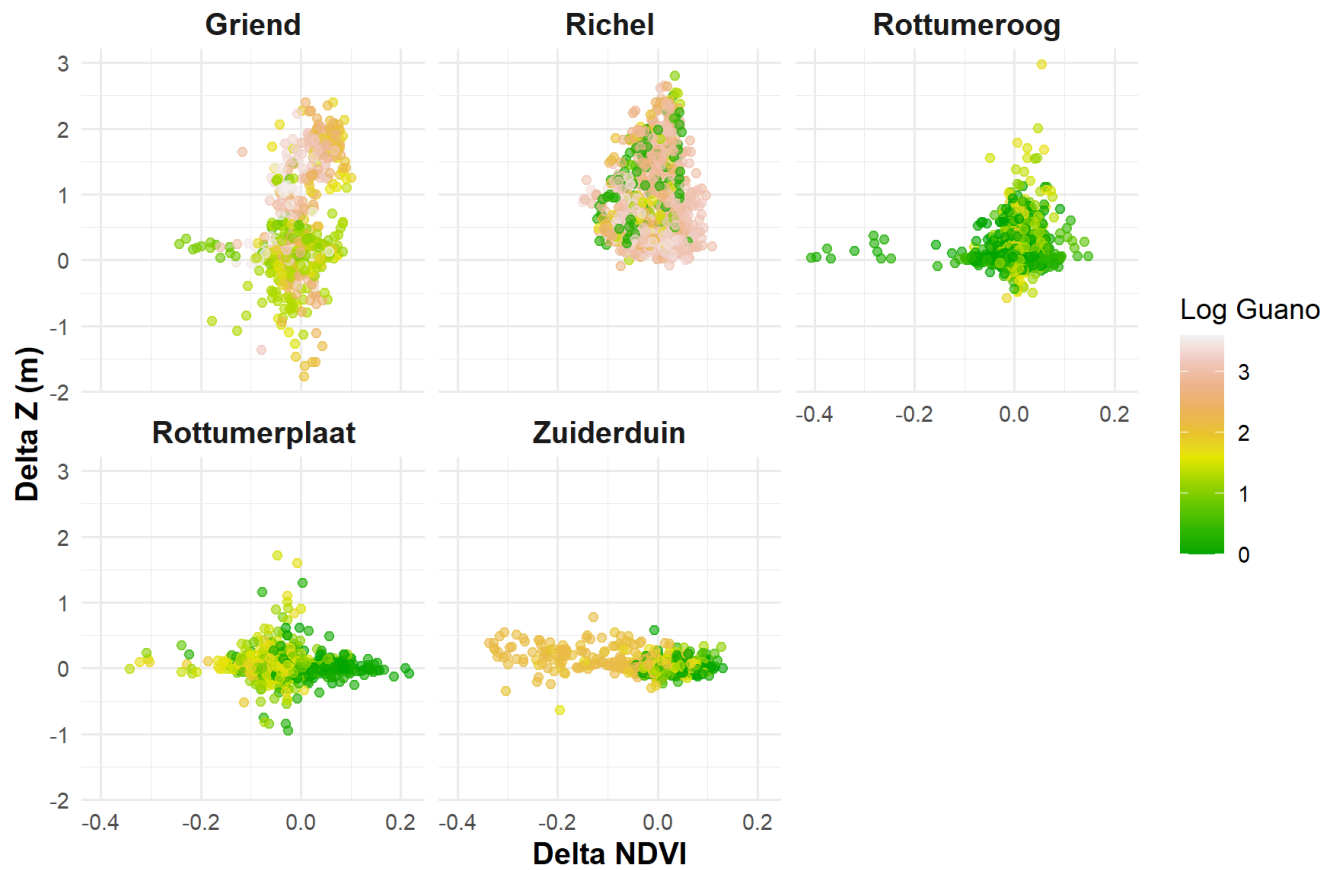

S8: Relationships between delta Z (m) (change in elevation), and delta NDVI (change in vegetation presence), per island. Delta's are computed based on the difference between 2022 and 2021. The color expresses log-transformed guano deposition in g/m<sup>2</sup>/y on the original scale.

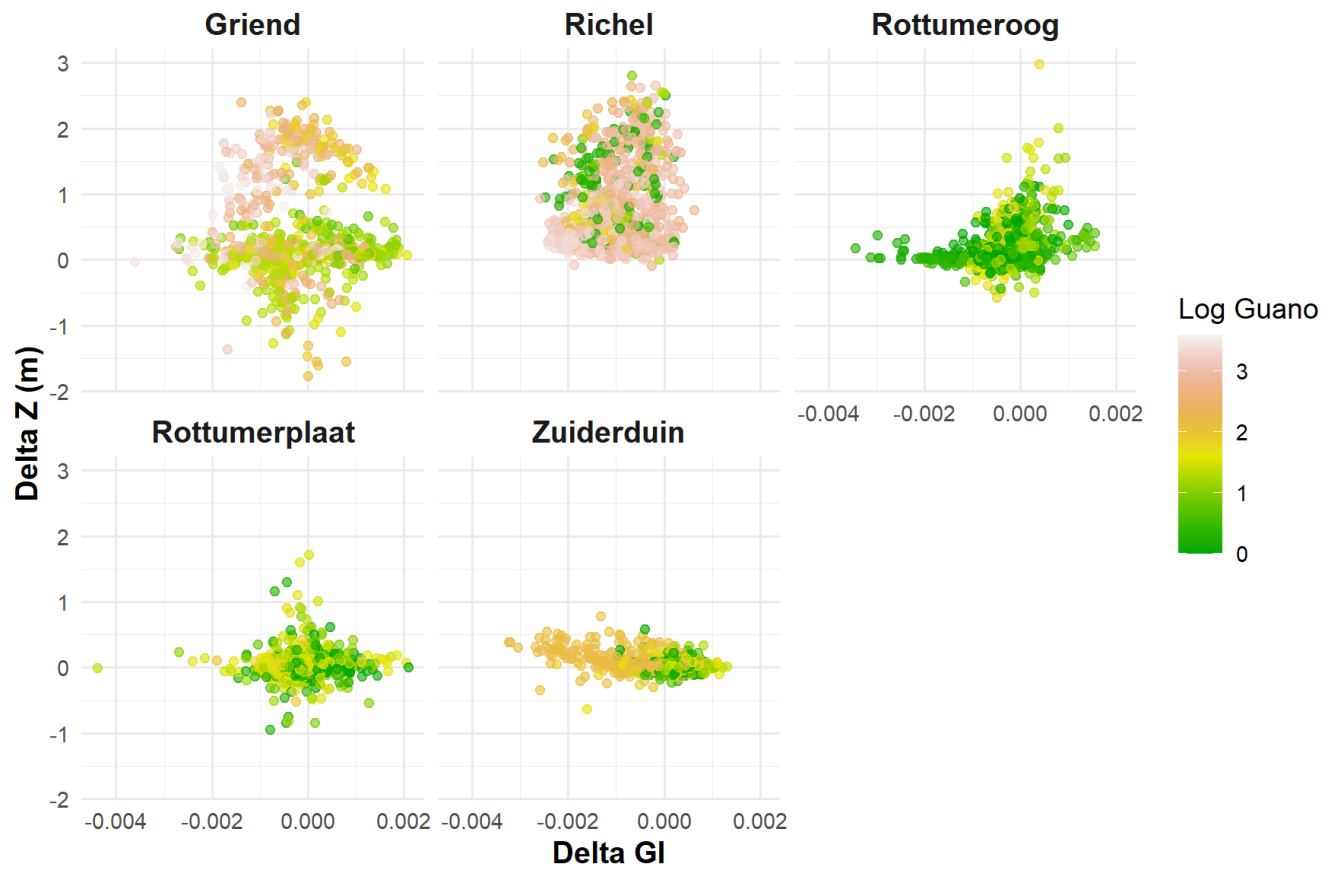

*S9: Relationships between delta Z (m) (change in elevation), and delta GI (change in vegetation presence), per island. Delta's are computed based on the difference between 2022 and 2021. The color expresses log-transformed guano deposition in g/m<sup>2</sup>/y on the original scale.*

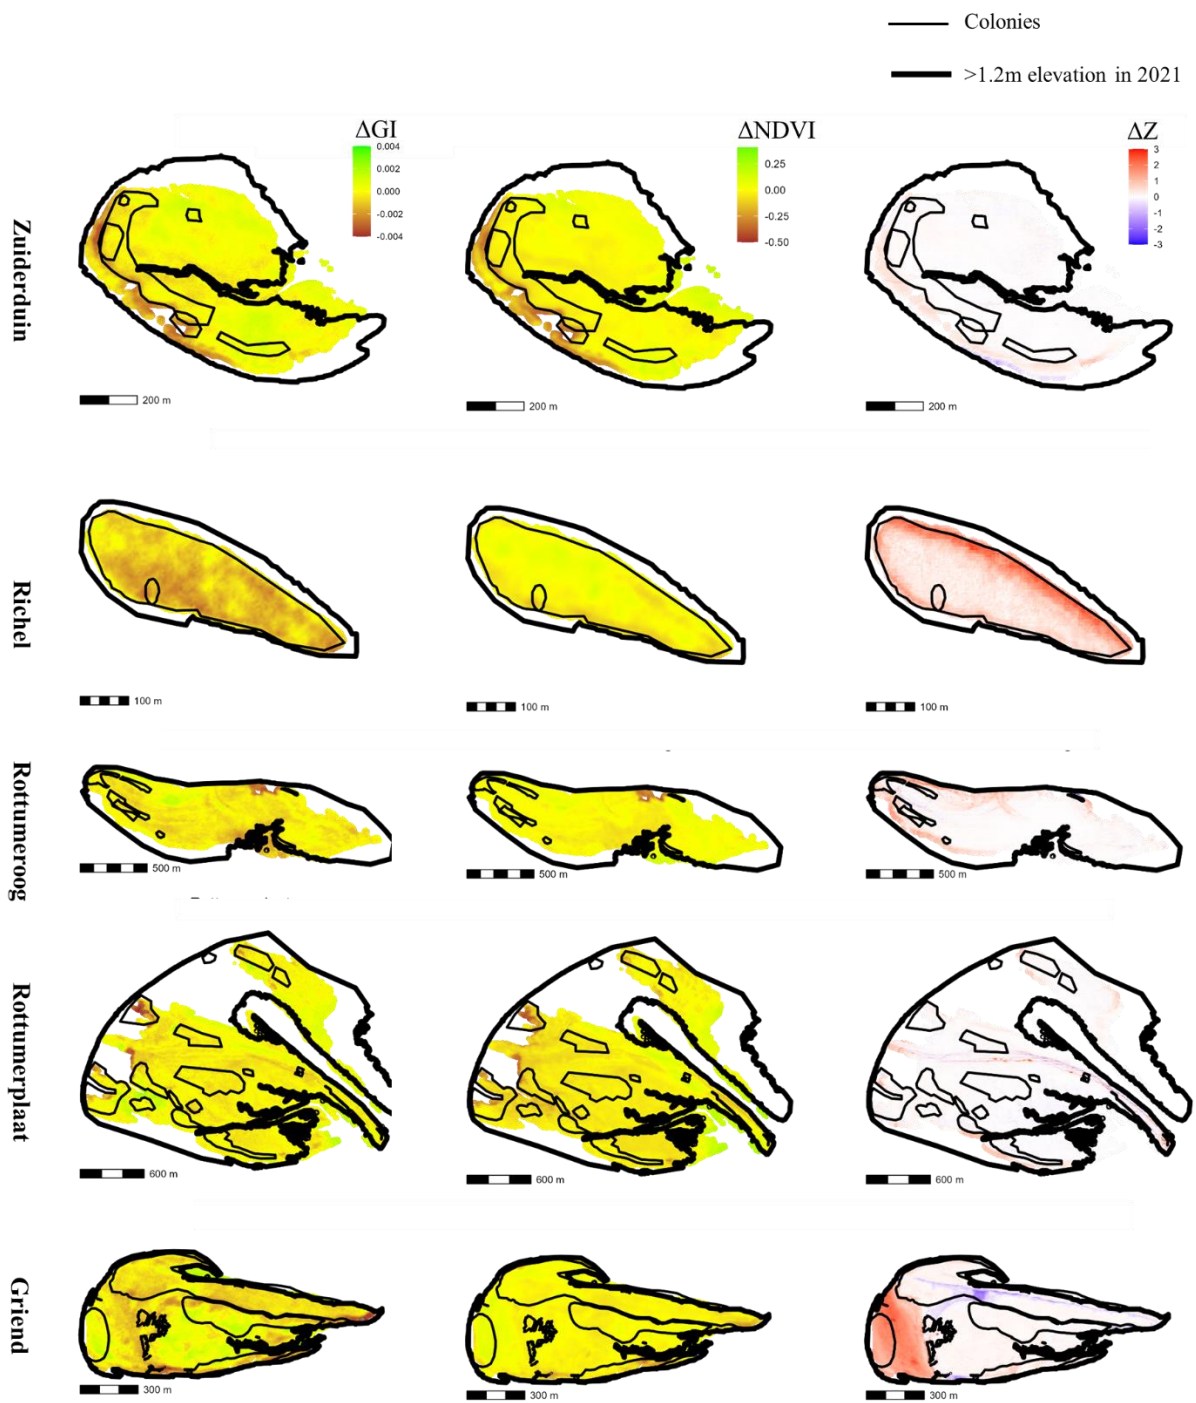

S10: Spatially explicit values of  $\Delta GI$ ,  $\Delta NDVI$ , and  $\Delta Z$ .
